# Supplementary material
Source: PubMed Central journal article supplement (PMC317335)
Supplement: 1472-6890-3-6-S1.pdf [file 1472-6890-3-6-S1.pdf]

**Table 4: Summary of deletions detected in glioma samples.** Non informative sites are interpreted as not having any detectable deletions.

| Histological Diagnosis:                      | A) All patients considered |                          |                                   |                                |                                           |                                      |                                     | B) Patients less than 60 years of age |                                   |                                |                                           |                                      |                                     |                          | C) Patients more than 60 years of age |                                |                                           |                                      |                                     |  |  |
|----------------------------------------------|----------------------------|--------------------------|-----------------------------------|--------------------------------|-------------------------------------------|--------------------------------------|-------------------------------------|---------------------------------------|-----------------------------------|--------------------------------|-------------------------------------------|--------------------------------------|-------------------------------------|--------------------------|---------------------------------------|--------------------------------|-------------------------------------------|--------------------------------------|-------------------------------------|--|--|
|                                              | WHO grade                  | Total number of Patients | Number without deletions detected | Number with deletions detected | Number with 1p and 19q deletions detected | Number with 19q deletion(s) detected | Number with 1p deletion(s) detected | Total number of Patients              | Number without deletions detected | Number with deletions detected | Number with 1p and 19q deletions detected | Number with 19q deletion(s) detected | Number with 1p deletion(s) detected | Total number of Patients | Number without deletions detected     | Number with deletions detected | Number with 1p and 19q deletions detected | Number with 19q deletion(s) detected | Number with 1p deletion(s) detected |  |  |
| <b>Oligodendroglioma samples (Total)</b>     |                            | 31                       | 13                                | 18                             | 13                                        | 4                                    | 1                                   | 25                                    | 8                                 | 17                             | 13                                        | 3                                    | 1                                   | 6                        | 5                                     | 1                              | 0                                         | 1                                    | 0                                   |  |  |
| oligodendroglioma, anaplastic                | 3                          | 14                       | 6                                 | 8                              | 4                                         | 3                                    | 1                                   | 9                                     | 2                                 | 7                              | 4                                         | 2                                    | 1                                   | 5                        | 4                                     | 1                              | 0                                         | 1                                    | 0                                   |  |  |
| oligodendroglioma                            | 2                          | 17                       | 7                                 | 10                             | 9                                         | 1                                    | 0                                   | 16                                    | 6                                 | 10                             | 9                                         | 1                                    | 0                                   | 1                        | 1                                     | 0                              | 0                                         | 0                                    | 0                                   |  |  |
| <b>Glioblastoma multiforme</b>               | 4                          | 21                       | 10                                | 11                             | 4                                         | 5                                    | 2                                   | 9                                     | 4                                 | 5                              | 2                                         | 2                                    | 1                                   | 12                       | 6                                     | 6                              | 2                                         | 3                                    | 1                                   |  |  |
| <b>Other Glioma Samples (Total)</b>          |                            | 11                       | 8                                 | 3                              | 2                                         | 1                                    | 0                                   | 7                                     | 4                                 | 3                              | 2                                         | 1                                    | 0                                   | 4                        | 4                                     | 0                              | 0                                         | 0                                    | 0                                   |  |  |
| oligoastrocytoma, anaplastic                 | 3                          | 6                        | 4                                 | 2                              | 1                                         | 1                                    | 0                                   | 4                                     | 2                                 | 2                              | 1                                         | 1                                    | 0                                   | 2                        | 2                                     | 0                              | 0                                         | 0                                    | 0                                   |  |  |
| oligoastrocytoma                             | 2                          | 3                        | 2                                 | 1                              | 1                                         | 0                                    | 0                                   | 3                                     | 2                                 | 1                              | 1                                         | 0                                    | 0                                   | 0                        | 0                                     | 0                              | 0                                         | 0                                    | 0                                   |  |  |
| dysembryoplastic neuroepithelial tumor (DNT) | 1                          | 1                        | 1                                 | 0                              | 0                                         | 0                                    | 0                                   | 0                                     | 0                                 | 0                              | 0                                         | 0                                    | 0                                   | 1                        | 1                                     | 0                              | 0                                         | 0                                    | 0                                   |  |  |
| astrocytoma, anaplastic                      | 3                          | 1                        | 1                                 | 0                              | 0                                         | 0                                    | 0                                   | 0                                     | 0                                 | 0                              | 0                                         | 0                                    | 0                                   | 1                        | 1                                     | 0                              | 0                                         | 0                                    | 0                                   |  |  |
